# Supplementary material
Source: Springer Nature journal article supplement (https://www.springermedizin.de/resource/supplementary/12967_2012_1426_MOESM1_ESM.pdf/9574664)

let 7b  $p=0.041$

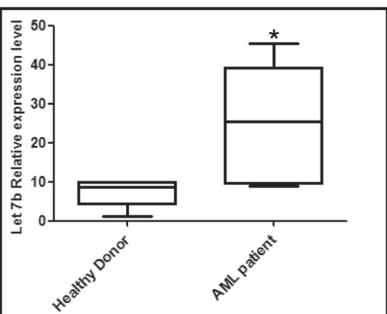

let 7d  $p=0.02$

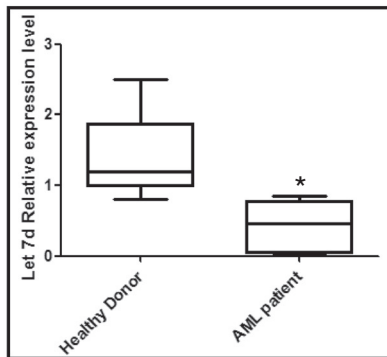

miR-150  $p=0.0055$

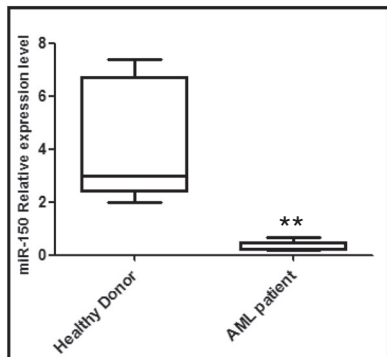

miR-339  $p=0.038$

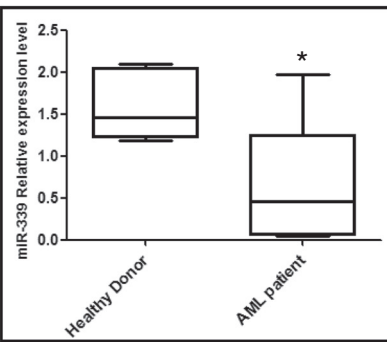

miR-342  $p=0.0085$

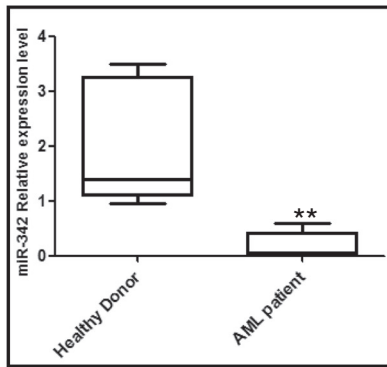

miR-523  $p=0.037$

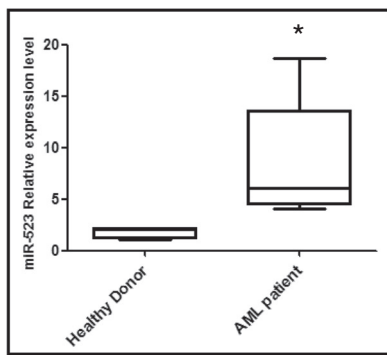

Supplement: MOESM1 [file 9574664]
